# Supplementary material for: Comparison of self-reported and register-based hospital medical data on comorbidities in women
Source: PubMed Central journal article supplement (PMC6400937; doi:10.1038/s41598-019-40072-0), 2019-03-05
Supplement: 41598_2019_40072_MOESM1_ESM.pdf [file 41598_2019_40072_MOESM1_ESM.pdf]

# Comparison of self-reported and register-based hospital medical data on comorbidities in women

Running title: Comparing self-reported and register-based data

|                                     |                              |
|-------------------------------------|------------------------------|
| Peh Joo Ho <sup>1,2</sup>           | ho_peh_joo@gis.a-star.edu.sg |
| Chuen Seng Tan <sup>2</sup>         | ephtcs@nus.edu.sg            |
| Shajedur Rahman Shawon <sup>3</sup> | md.shawon@dph.ox.ac.uk       |
| Mikael Eriksson <sup>4</sup>        | mikael.eriksson@ki.se        |
| Li Yan Lim <sup>5</sup>             | li_yan_lim@nuhs.edu.sg       |
| Hui Miao <sup>1</sup>               | miao_hui@gis.a-star.edu.sg   |
| Eileen Png <sup>1</sup>             | pnge@gis.a-star.edu.sg       |
| Kee Seng Chia <sup>2</sup>          | kee_seng_chia@nus.edu.sg     |
| Mikael Hartman <sup>6</sup>         | ephbamh@nus.edu.sg           |
| Jonas F Ludvigsson <sup>4,7,8</sup> | jonas.ludvigsson@ki.se       |
| Kamila Czene <sup>4</sup>           | kamila.czene@ki.se           |
| Per Hall <sup>4,9</sup>             | per.hall@ki.se               |
| *Jingmei Li <sup>1,4,5</sup>        | lijm1@gis.a-star.edu.sg      |

<sup>1</sup> Genome Institute of Singapore, 60 Biopolis Street, Genome, #02-01, Singapore 138672, Singapore

<sup>2</sup> Saw Swee Hock School of Public Health, National University of Singapore and National University Health System, Singapore

<sup>3</sup> Cancer Epidemiology Unit, Nuffield Department of Population Health, University of Oxford, Old road campus, OX3 7LF, Oxford, UK

<sup>4</sup> Karolinska Institutet, Department of Medical Epidemiology and Biostatistics, Box 281, 171 77 Stockholm, Sweden

<sup>5</sup> Department of Surgery, University Surgical Cluster, National University Hospital, Singapore

<sup>6</sup> Department of Surgery, Yong Loo Lin School of Medicine, National University of Singapore, Singapore

<sup>7</sup> Department Medical Epidemiology and Biostatistics, Karolinska Institutet, Stockholm, Sweden

<sup>8</sup> Department of Pediatrics, Örebro University Hospital, Örebro University, Örebro, Sweden

<sup>9</sup> Department of Oncology, Södersjukhuset, 118 84 Stockholm, Sweden

\***Correspondence to:** Jingmei Li, Genome Institute of Singapore, 60 Biopolis Street, Genome, #02-01, Singapore 138672, Singapore. Tel: (65) 6808 8312; Email: [lijm1@gis.a-star.edu.sg](mailto:lijm1@gis.a-star.edu.sg)

**Conflict of interest:** The authors declare no potential conflicts of interest.

## Content

|                                                                                                                                                                                                             | <b>Page</b> |
|-------------------------------------------------------------------------------------------------------------------------------------------------------------------------------------------------------------|-------------|
| <b>Supplementary Method:</b> To show that the positive specific agreement is the inverse transformed mean of the sensitivity and positive predictive values                                                 | 3           |
| <b>Supplementary Table 1.</b> International Classification of Diseases (ICD) codes used for classifying nine medical conditions.                                                                            | 4           |
| <b>Supplementary Table 2.</b> Agreement between self-reported medical conditions and hospital-documented disease in 64,961 women attending mammography units in the KARMA study                             | 5           |
| <b>Supplementary Table 3.</b> Subset analysis by age categories                                                                                                                                             | 6           |
| <b>Supplementary Table 4.</b> Subset analysis by education categories                                                                                                                                       | 7           |
| <b>Supplementary Table 5.</b> Subset analysis by body mass index (BMI) categories                                                                                                                           | 8           |
| <b>Supplementary Table 6.</b> Subset analysis by smoking status (Have you ever smoked regularly for more than 1 year or 100 cigarettes in total?)                                                           | 9           |
| <b>Supplementary Table 7.</b> Odds ratio and corresponding 95% confidence intervals for positive specific agreement in each medical condition. Significant associations ( $P < 0.05$ ) are denoted in bold. | 10          |

## Supplementary Method

To show that the positive specific agreement is the inverse transformed mean of the sensitivity and positive predictive values.

|        |     | Test 1 |     |
|--------|-----|--------|-----|
|        |     | Yes    | No  |
| Test 2 | Yes | y/y    | y/n |
|        | No  | n/y    | n/n |

$$\text{Sensitivity} = \frac{[y/y]}{[y/y] + [n/y]}$$

$$\text{Positive predictive value (PPV)} = \frac{[y/y]}{[y/y] + [y/n]}$$

$$\begin{aligned} \left( \frac{1}{\text{positive specific agreement}} \right) &= \frac{1}{2} \left( \frac{1}{\text{Sensitivity}} + \frac{1}{\text{PPV}} \right) \\ &= \frac{1}{2} \left( \frac{[y/y] + [n/y]}{[y/y]} + \frac{[y/y] + [y/n]}{[y/y]} \right) \\ &= \frac{[y/y] + [n/y] + [y/y] + [y/n] + [n/n] - [n/n]}{2[y/y]} \\ &= \left( \frac{N + [y/y] - [n/n]}{2[y/y]} \right) \end{aligned}$$

$$\text{Thus, positive specific agreement} = \left( \frac{2[y/y]}{N + [y/y] - [n/n]} \right)$$

**Supplementary Table 1.** International Classification of Diseases (ICD) codes used for classifying nine medical conditions.

|                                        | Reference        | ICD7<br>Prior to 1968 | ICD8<br>1969 to 1986       | ICD9<br>1987 to 1996 | ICD10<br>1997 to<br>present |
|----------------------------------------|------------------|-----------------------|----------------------------|----------------------|-----------------------------|
| Hypertension                           | <sup>40</sup>    | 440, 441              | 400, 401                   | 401                  | I10                         |
| Hyperlipidemia                         | <sup>41</sup>    | Not available         | 272.4                      | 272.4                | E785                        |
| Heart failure                          | <sup>42</sup>    | 782.4, 434.1, 434.2   | 428                        | 428                  | I50                         |
| Myocardial infarction                  | <sup>43</sup>    |                       | 410                        | 410                  | I21, I22                    |
| Angina                                 | <sup>44,45</sup> | 420.2                 | 411, 413, 786              | 411, 413, 786        | I20, I24,<br>R07            |
| Stroke                                 | <sup>46-49</sup> | 330-334               | 430-436                    | 430-436              | I60-64,<br>I67-69           |
| Polycystic ovaries or<br>ovarian cysts | <sup>50</sup>    | 275.2                 | 256.4, 256.9, 220.1, 615.2 | 256E, 620.2          | E282,<br>N832               |
| Preeclampsia                           | <sup>51</sup>    | 642.2                 | 637                        | 642E-F               | O14                         |
| Diabetes (Type I and II)               | <sup>52</sup>    | 260                   | 250                        | 250                  | E10-E11                     |

**Supplementary Table 2.** Agreement between self-reported medical conditions and hospital-documented disease in 64,961 women attending mammography units in the KARMA study

| Condition                              | Self-reported No/<br>NPR No ( <i>n</i> , %) | Self-reported Yes/<br>NPR No ( <i>n</i> , %) | Self-reported No/<br>NPR Yes ( <i>n</i> , %) | Self-reported Yes/<br>NPR Yes ( <i>n</i> , %) | Percent agreement |          |          |          | Prevalence<br>index | Bias<br>index | PABAK | Cohen's<br>Kappa | Judgement   |
|----------------------------------------|---------------------------------------------|----------------------------------------------|----------------------------------------------|-----------------------------------------------|-------------------|----------|----------|----------|---------------------|---------------|-------|------------------|-------------|
|                                        |                                             |                                              |                                              |                                               | Overall           | Expected | Positive | Negative |                     |               |       |                  |             |
| Hypertension                           | 51,380 (79.1)                               | 7,999 (12.3)                                 | 701 (1.1)                                    | 4,881 (7.5)                                   | 86.6              | 75.0     | 52.9     | 92.2     | 0.72                | 0.11          | 0.73  | 0.46             | Moderate    |
| Hyperlipidemia                         | 57,731 (88.9)                               | 6,411 (9.9)                                  | 197 (0.3)                                    | 622 (1.0)                                     | 89.8              | 88.2     | 15.8     | 94.6     | 0.88                | 0.10          | 0.80  | 0.14             | Slight      |
| Heart failure                          | 64,433 (99.2)                               | 241 (0.4)                                    | 155 (0.2)                                    | 132 (0.2)                                     | 99.4              | 99.0     | 40.0     | 99.7     | 0.99                | 0             | 0.99  | 0.40             | Fair        |
| Myocardial infarction                  | 64,391 (99.1)                               | 144 (0.2)                                    | 88 (0.1)                                     | 338 (0.5)                                     | 99.6              | 98.6     | 74.4     | 99.8     | 0.99                | 0             | 0.99  | 0.74             | Substantial |
| Angina                                 | 57,230 (88.1)                               | 120 (0.2)                                    | 7,146 (11.0)                                 | 465 (0.7)                                     | 88.8              | 87.6     | 11.3     | 94.0     | 0.87                | -0.11         | 0.78  | 0.10             | Slight      |
| Stroke                                 | 63,848 (98.3)                               | 171 (0.3)                                    | 417 (0.6)                                    | 525 (0.8)                                     | 99.1              | 97.5     | 64.1     | 99.5     | 0.97                | 0             | 0.98  | 0.64             | Substantial |
| Polycystic ovaries or<br>ovarian cysts | 57,152 (88.0)                               | 4,492 (6.9)                                  | 1,829 (2.8)                                  | 1,488 (2.3)                                   | 90.3              | 86.6     | 32.0     | 94.8     | 0.86                | 0.04          | 0.81  | 0.27             | Fair        |
| Preeclampsia <sup>1</sup>              | 54,272 (92.1)                               | 1,208 (2.0)                                  | 1,734 (2.9)                                  | 1,722 (2.9)                                   | 95.0              | 89.7     | 53.9     | 97.4     | 0.89                | -0.01         | 0.90  | 0.51             | Moderate    |
| Diabetes                               | 62,980 (97.0)                               | 601 (0.9)                                    | 262 (0.4)                                    | 1,118 (1.7)                                   | 98.7              | 95.3     | 72.2     | 99.3     | 0.95                | 0.01          | 0.97  | 0.71             | Substantial |

Abbreviations: NPR: National Patient Register; PABAK: Prevalence and bias corrected kappa statistic

<sup>1</sup> Includes women who had at least 1 full-term pregnancy (*n*=58,936)

**Supplementary Table 3. Subset analysis by age categories**

| Condition                           | Self-reported No/<br>NPR No (n, %) | Self-reported Yes/<br>NPR No (n, %) | Self-reported No/<br>NPR Yes (n, %) | Self-reported Yes/<br>NPR Yes (n, %) | Percent agreement |          |          |          | Prevalence<br>index | Bias<br>index | PABAK | Cohen's<br>Kappa |
|-------------------------------------|------------------------------------|-------------------------------------|-------------------------------------|--------------------------------------|-------------------|----------|----------|----------|---------------------|---------------|-------|------------------|
|                                     |                                    |                                     |                                     |                                      | Overall           | Expected | Positive | Negative |                     |               |       |                  |
| <i>Age&lt;50 (n=23,154)</i>         |                                    |                                     |                                     |                                      |                   |          |          |          |                     |               |       |                  |
| Hypertension                        | 21,422 (92.5)                      | 1,292 (5.6)                         | 78 (0.3)                            | 362 (1.6)                            | 94.1              | 91.2     | 34.6     | 96.9     | 0.91                | 0.05          | 0.88  | 0.33             |
| Hyperlipidemia                      | 22,474 (97.1)                      | 653 (2.8)                           | 11 (0.0)                            | 16 (0.1)                             | 97.1              | 97.0     | 4.60     | 98.5     | 0.97                | 0.03          | 0.94  | 0.04             |
| Heart failure                       | 23,117 (99.8)                      | 18 (0.1)                            | 12 (0.1)                            | 7 (0.0)                              | 99.9              | 99.8     | 31.8     | 99.9     | 1                   | 0             | 1     | 0.32             |
| Myocardial infarction               | 23,116 (99.8)                      | 6 (0.0)                             | 10 (0.0)                            | 22 (0.1)                             | 99.9              | 99.7     | 73.3     | 100.0    | 1                   | 0             | 1     | 0.73             |
| Angina                              | 21,676 (93.6)                      | 9 (0.0)                             | 1,455 (6.3)                         | 14 (0.1)                             | 93.7              | 93.6     | 1.90     | 96.7     | 0.94                | -0.06         | 0.87  | 0.02             |
| Stroke                              | 23,028 (99.5)                      | 16 (0.1)                            | 53 (0.2)                            | 57 (0.2)                             | 99.7              | 99.2     | 62.3     | 99.9     | 0.99                | 0             | 0.99  | 0.62             |
| Polycystic ovaries or ovarian cysts | 20,534 (88.7)                      | 1,385 (6.0)                         | 669 (2.9)                           | 566 (2.4)                            | 91.1              | 87.1     | 35.5     | 95.2     | 0.86                | 0.03          | 0.82  | 0.31             |
| Preeclampsia <sup>1</sup>           | 58,090 (92.6)                      | 1,208 (1.9)                         | 1,741 (2.8)                         | 1,723 (2.7)                          | 95.3              | 90.3     | 53.9     | 97.5     | 0.90                | -0.01         | 0.91  | 0.51             |
| Diabetes                            | 22,863 (98.7)                      | 72 (0.3)                            | 26 (0.1)                            | 193 (0.8)                            | 99.6              | 97.9     | 79.8     | 99.8     | 0.98                | 0             | 0.99  | 0.80             |
| <i>Age 50-59 (n=18,797)</i>         |                                    |                                     |                                     |                                      |                   |          |          |          |                     |               |       |                  |
| Hypertension                        | 15,270 (81.2)                      | 2,318 (12.3)                        | 134 (0.7)                           | 1,075 (5.7)                          | 87.0              | 77.8     | 46.7     | 92.6     | 0.76                | 0.12          | 0.74  | 0.41             |
| Hyperlipidemia                      | 17,137 (91.2)                      | 1,519 (8.1)                         | 38 (0.2)                            | 103 (0.5)                            | 91.7              | 90.8     | 11.7     | 95.7     | 0.91                | 0.08          | 0.83  | 0.10             |
| Heart failure                       | 18,703 (99.5)                      | 41 (0.2)                            | 30 (0.2)                            | 23 (0.1)                             | 99.6              | 99.4     | 39.3     | 99.8     | 0.99                | 0             | 0.99  | 0.39             |
| Myocardial infarction               | 18,698 (99.5)                      | 27 (0.1)                            | 13 (0.1)                            | 59 (0.3)                             | 99.8              | 99.2     | 74.7     | 99.9     | 0.99                | 0             | 1     | 0.75             |
| Angina                              | 16,720 (89.0)                      | 14 (0.1)                            | 1,990 (10.6)                        | 73 (0.4)                             | 89.3              | 88.7     | 6.8      | 94.3     | 0.89                | -0.11         | 0.79  | 0.06             |
| Stroke                              | 18,584 (98.9)                      | 31 (0.2)                            | 80 (0.4)                            | 102 (0.5)                            | 99.4              | 98.3     | 64.8     | 99.7     | 0.98                | 0             | 0.99  | 0.64             |
| Polycystic ovaries or ovarian cysts | 16,386 (87.2)                      | 1,301 (6.9)                         | 642 (3.4)                           | 468 (2.5)                            | 89.7              | 85.8     | 32.5     | 94.4     | 0.85                | 0.04          | 0.79  | 0.27             |
| Preeclampsia <sup>2</sup>           | 58,503 (92.6)                      | 1,209 (1.9)                         | 1,740 (2.8)                         | 1,724 (2.7)                          | 95.3              | 90.4     | 53.9     | 97.5     | 0.90                | -0.01         | 0.91  | 0.51             |
| Diabetes                            | 18,340 (97.6)                      | 155 (0.8)                           | 60 (0.3)                            | 242 (1.3)                            | 98.9              | 96.3     | 69.2     | 99.4     | 0.96                | 0.01          | 0.98  | 0.69             |
| <i>Age≥60 (n=23,010)</i>            |                                    |                                     |                                     |                                      |                   |          |          |          |                     |               |       |                  |
| Hypertension                        | 14,688 (63.8)                      | 4,389 (19.1)                        | 489 (2.1)                           | 3,444 (15.0)                         | 78.8              | 60.5     | 58.5     | 85.8     | 0.49                | 0.17          | 0.58  | 0.46             |
| Hyperlipidemia                      | 18,120 (78.7)                      | 4,239 (18.4)                        | 148 (0.6)                           | 503 (2.2)                            | 80.9              | 77.7     | 18.7     | 89.2     | 0.77                | 0.18          | 0.62  | 0.14             |
| Heart failure                       | 22,613 (98.3)                      | 182 (0.8)                           | 113 (0.5)                           | 102 (0.4)                            | 98.7              | 97.9     | 40.9     | 99.4     | 0.98                | 0             | 0.97  | 0.40             |
| Myocardial infarction               | 22,577 (98.1)                      | 111 (0.5)                           | 65 (0.3)                            | 257 (1.1)                            | 99.2              | 97.0     | 74.5     | 99.6     | 0.97                | 0             | 0.98  | 0.74             |
| Angina                              | 18,834 (81.9)                      | 97 (0.4)                            | 3,701 (16.1)                        | 378 (1.6)                            | 83.5              | 80.9     | 16.6     | 90.8     | 0.80                | -0.16         | 0.67  | 0.13             |
| Stroke                              | 22,236 (96.6)                      | 124 (0.5)                           | 284 (1.2)                           | 366 (1.6)                            | 98.2              | 95.2     | 64.2     | 99.1     | 0.95                | -0.01         | 0.96  | 0.63             |
| Polycystic ovaries or ovarian cysts | 20,232 (87.9)                      | 1,806 (7.8)                         | 518 (2.3)                           | 454 (2.0)                            | 89.9              | 86.8     | 28.1     | 94.6     | 0.86                | 0.06          | 0.80  | 0.24             |
| Preeclampsia <sup>3</sup>           | 58,243 (92.6)                      | 1,209 (1.9)                         | 1,743 (2.8)                         | 1,725 (2.7)                          | 95.3              | 90.3     | 53.9     | 97.5     | 0.90                | -0.01         | 0.91  | 0.51             |
| Diabetes                            | 21,777 (94.6)                      | 374 (1.6)                           | 176 (0.8)                           | 683 (3.0)                            | 97.6              | 92.0     | 71.3     | 98.8     | 0.92                | 0.01          | 0.95  | 0.70             |

<sup>1</sup> Includes women who had at least 1 full-term pregnancy (n=20,955)

<sup>2</sup> Includes women who had at least 1 full-term pregnancy (n=17,012)

<sup>3</sup> Includes women who had at least 1 full-term pregnancy (n=20,969)

Abbreviations: NPR: National Patient Register; PABAK: Prevalence and bias corrected kappa statistic

**Supplementary Table 4. Subset analysis by education categories**

| Condition                           | Self-reported No/<br>NPR No (n, %) | Self-reported Yes/<br>NPR No (n, %) | Self-reported No/<br>NPR Yes (n, %) | Self-reported Yes/<br>NPR Yes (n, %) | Percent agreement |          |          |          | Prevalence<br>index | Bias<br>index | PABAK | Cohen's<br>Kappa |
|-------------------------------------|------------------------------------|-------------------------------------|-------------------------------------|--------------------------------------|-------------------|----------|----------|----------|---------------------|---------------|-------|------------------|
|                                     |                                    |                                     |                                     |                                      | Overall           | Expected | Positive | Negative |                     |               |       |                  |
| <i>Elementary (n=7,793)</i>         |                                    |                                     |                                     |                                      |                   |          |          |          |                     |               |       |                  |
| Hypertension                        | 5,019 (64.4)                       | 1,478 (19.0)                        | 173 (2.2)                           | 1,123 (14.4)                         | 78.8              | 61.1     | 57.6     | 85.9     | 0.50                | 0.17          | 0.58  | 0.46             |
| Hyperlipidemia                      | 6,240 (80.1)                       | 1,343 (17.2)                        | 45 (0.6)                            | 165 (2.1)                            | 82.2              | 79.0     | 19.2     | 90.0     | 0.78                | 0.17          | 0.64  | 0.15             |
| Heart failure                       | 7,661 (98.3)                       | 59 (0.8)                            | 35 (0.4)                            | 38 (0.5)                             | 98.8              | 97.8     | 44.7     | 99.4     | 0.98                | 0             | 0.98  | 0.44             |
| Myocardial infarction               | 7,646 (98.1)                       | 41 (0.5)                            | 26 (0.3)                            | 80 (1.0)                             | 99.1              | 97.1     | 70.5     | 99.6     | 0.97                | 0             | 0.98  | 0.70             |
| Angina                              | 6,422 (82.4)                       | 36 (0.5)                            | 1,205 (15.5)                        | 130 (1.7)                            | 84.1              | 81.5     | 17.3     | 91.2     | 0.81                | -0.15         | 0.68  | 0.14             |
| Stroke                              | 7,541 (96.8)                       | 42 (0.5)                            | 88 (1.1)                            | 122 (1.6)                            | 98.3              | 95.3     | 65.2     | 99.1     | 0.95                | -0.01         | 0.97  | 0.64             |
| Polycystic ovaries or ovarian cysts | 6,778 (87.0)                       | 633 (8.1)                           | 197 (2.5)                           | 185 (2.4)                            | 89.3              | 85.6     | 30.8     | 94.2     | 0.85                | 0.06          | 0.79  | 0.26             |
| Preeclampsia <sup>1</sup>           | 59,751 (92.7)                      | 1,209 (1.9)                         | 1,745 (2.7)                         | 1,725 (2.7)                          | 95.4              | 90.6     | 53.9     | 97.6     | 0.90                | -0.01         | 0.91  | 0.51             |
| Diabetes                            | 7,346 (94.3)                       | 147 (1.9)                           | 57 (0.7)                            | 243 (3.1)                            | 97.4              | 91.5     | 70.4     | 98.6     | 0.91                | 0.01          | 0.95  | 0.69             |
| <i>Intermediate (n=17,721)</i>      |                                    |                                     |                                     |                                      |                   |          |          |          |                     |               |       |                  |
| Hypertension                        | 14,270 (80.5)                      | 2,141 (12.1)                        | 158 (0.9)                           | 1,152 (6.5)                          | 87.0              | 76.8     | 50.1     | 92.5     | 0.74                | 0.11          | 0.74  | 0.44             |
| Hyperlipidemia                      | 15,991 (90.2)                      | 1,549 (8.7)                         | 53 (0.3)                            | 128 (0.7)                            | 91.0              | 89.7     | 13.8     | 95.2     | 0.90                | 0.08          | 0.82  | 0.12             |
| Heart failure                       | 17,603 (99.3)                      | 47 (0.3)                            | 38 (0.2)                            | 33 (0.2)                             | 99.5              | 99.2     | 43.7     | 99.8     | 0.99                | 0             | 0.99  | 0.43             |
| Myocardial infarction               | 17,588 (99.2)                      | 31 (0.2)                            | 20 (0.1)                            | 82 (0.5)                             | 99.7              | 98.8     | 76.3     | 99.9     | 0.99                | 0             | 0.99  | 0.76             |
| Angina                              | 15,728 (88.8)                      | 28 (0.2)                            | 1,867 (10.5)                        | 98 (0.6)                             | 89.3              | 88.4     | 9.4      | 94.3     | 0.88                | -0.10         | 0.79  | 0.08             |
| Stroke                              | 17,474 (98.6)                      | 33 (0.2)                            | 108 (0.6)                           | 106 (0.6)                            | 99.2              | 98.0     | 60.1     | 99.6     | 0.98                | 0             | 0.98  | 0.60             |
| Polycystic ovaries or ovarian cysts | 15,512 (87.5)                      | 1,259 (7.1)                         | 548 (3.1)                           | 402 (2.3)                            | 89.8              | 86.3     | 30.8     | 94.5     | 0.85                | 0.04          | 0.80  | 0.26             |
| Preeclampsia <sup>2</sup>           | 58,796 (92.6)                      | 1,209 (1.9)                         | 1,744 (2.7)                         | 1,724 (2.7)                          | 95.3              | 90.4     | 53.9     | 97.6     | 0.90                | -0.01         | 0.91  | 0.51             |
| Diabetes                            | 17,211 (97.1)                      | 156 (0.9)                           | 60 (0.3)                            | 294 (1.7)                            | 98.8              | 95.6     | 73.1     | 99.4     | 0.95                | 0.01          | 0.98  | 0.73             |
| <i>University (n=29,400)</i>        |                                    |                                     |                                     |                                      |                   |          |          |          |                     |               |       |                  |
| Hypertension                        | 24,742 (84.2)                      | 2,873 (9.8)                         | 206 (0.7)                           | 1,579 (5.4)                          | 89.5              | 80.6     | 50.6     | 94.1     | 0.79                | 0.09          | 0.79  | 0.46             |
| Hyperlipidemia                      | 26,937 (91.6)                      | 2,215 (7.5)                         | 62 (0.2)                            | 186 (0.6)                            | 92.3              | 91.1     | 14.0     | 95.9     | 0.91                | 0.07          | 0.85  | 0.13             |
| Heart failure                       | 29,234 (99.4)                      | 75 (0.3)                            | 53 (0.2)                            | 38 (0.1)                             | 99.6              | 99.3     | 37.3     | 99.8     | 0.99                | 0             | 0.99  | 0.37             |
| Myocardial infarction               | 29,245 (99.5)                      | 37 (0.1)                            | 24 (0.1)                            | 94 (0.3)                             | 99.8              | 99.2     | 75.5     | 99.9     | 0.99                | 0             | 1     | 0.75             |
| Angina                              | 26,493 (90.1)                      | 27 (0.1)                            | 2,755 (9.4)                         | 125 (0.4)                            | 90.5              | 89.8     | 8.2      | 95.0     | 0.90                | -0.09         | 0.81  | 0.07             |
| Stroke                              | 29,029 (98.7)                      | 58 (0.2)                            | 137 (0.5)                           | 176 (0.6)                            | 99.3              | 98.2     | 64.4     | 99.7     | 0.98                | 0             | 0.99  | 0.64             |
| Polycystic ovaries or ovarian cysts | 26,075 (88.7)                      | 1,873 (6.4)                         | 790 (2.7)                           | 662 (2.3)                            | 90.9              | 87.3     | 33.2     | 95.1     | 0.86                | 0.04          | 0.82  | 0.29             |
| Preeclampsia <sup>3</sup>           | 57,365 (92.5)                      | 1,209 (1.9)                         | 1,744 (2.8)                         | 1,723 (2.8)                          | 95.2              | 90.2     | 53.9     | 97.5     | 0.90                | -0.01         | 0.90  | 0.51             |
| Diabetes                            | 28,773 (97.9)                      | 190 (0.6)                           | 80 (0.3)                            | 357 (1.2)                            | 99.1              | 96.7     | 72.6     | 99.5     | 0.97                | 0             | 0.98  | 0.72             |

<sup>1</sup> Includes women who had at least 1 full-term pregnancy (n=7,262)

<sup>2</sup> Includes women who had at least 1 full-term pregnancy (n=16,233)

<sup>3</sup> Includes women who had at least 1 full-term pregnancy (n=26,480)

Abbreviations: NPR: National Patient Register; PABAK: Prevalence and bias corrected kappa statistic

**Supplementary Table 5.** Subset analysis by body mass index (BMI) categories

| Condition                           | Self-reported No/<br>NPR No (n, %) | Self-reported Yes/<br>NPR No (n, %) | Self-reported No/<br>NPR Yes (n, %) | Self-reported Yes/<br>NPR Yes (n, %) | Percent agreement |          |          |          | Prevalence<br>index | Bias<br>index | PABAK | Cohen's<br>Kappa |
|-------------------------------------|------------------------------------|-------------------------------------|-------------------------------------|--------------------------------------|-------------------|----------|----------|----------|---------------------|---------------|-------|------------------|
|                                     |                                    |                                     |                                     |                                      | Overall           | Expected | Positive | Negative |                     |               |       |                  |
| <i>BMI&lt;25 (n=35,700)</i>         |                                    |                                     |                                     |                                      |                   |          |          |          |                     |               |       |                  |
| Hypertension                        | 30,700 (86.0)                      | 3,083 (8.6)                         | 253 (0.7)                           | 1,664 (4.7)                          | 90.7              | 82.8     | 49.9     | 94.8     | 0.81                | 0.08          | 0.81  | 0.46             |
| Hyperlipidemia                      | 32,742 (91.7)                      | 2,657 (7.4)                         | 76 (0.2)                            | 225 (0.6)                            | 92.3              | 91.2     | 14.1     | 96.0     | 0.91                | 0.07          | 0.85  | 0.13             |
| Heart failure                       | 35,530 (99.5)                      | 85 (0.2)                            | 43 (0.1)                            | 42 (0.1)                             | 99.6              | 99.4     | 39.6     | 99.8     | 0.99                | 0             | 0.99  | 0.39             |
| Myocardial infarction               | 35,502 (99.4)                      | 48 (0.1)                            | 35 (0.1)                            | 115 (0.3)                            | 99.8              | 99.1     | 73.5     | 99.9     | 0.99                | 0             | 1     | 0.73             |
| Angina                              | 32,032 (89.7)                      | 48 (0.1)                            | 3,474 (9.7)                         | 146 (0.4)                            | 90.1              | 89.4     | 7.7      | 94.8     | 0.89                | -0.1          | 0.8   | 0.07             |
| Stroke                              | 35,204 (98.6)                      | 72 (0.2)                            | 202 (0.6)                           | 222 (0.6)                            | 99.2              | 98.0     | 61.8     | 99.6     | 0.98                | 0             | 0.98  | 0.61             |
| Polycystic ovaries or ovarian cysts | 31,654 (88.7)                      | 2,309 (6.5)                         | 1,001 (2.8)                         | 736 (2.1)                            | 90.7              | 87.4     | 30.8     | 95.0     | 0.87                | 0.04          | 0.81  | 0.26             |
| Preeclampsia <sup>1</sup>           | 57,138 (92.4)                      | 1,208 (2.0)                         | 1,745 (2.8)                         | 1,725 (2.8)                          | 95.2              | 90.2     | 53.9     | 97.5     | 0.9                 | -0.01         | 0.9   | 0.51             |
| Diabetes                            | 35,210 (98.6)                      | 115 (0.3)                           | 94 (0.3)                            | 281 (0.8)                            | 99.4              | 97.9     | 72.9     | 99.7     | 0.98                | 0             | 0.99  | 0.73             |
| <i>BMI≥25 (n=28,800)</i>            |                                    |                                     |                                     |                                      |                   |          |          |          |                     |               |       |                  |
| Hypertension                        | 20,304 (70.5)                      | 4,880 (16.9)                        | 418 (1.5)                           | 3,198 (11.1)                         | 81.6              | 66.4     | 54.7     | 88.5     | 0.59                | 0.15          | 0.63  | 0.45             |
| Hyperlipidemia                      | 24,555 (85.3)                      | 3,733 (13.0)                        | 117 (0.4)                           | 395 (1.4)                            | 86.6              | 84.4     | 17.0     | 92.7     | 0.84                | 0.13          | 0.73  | 0.14             |
| Heart failure                       | 28,448 (98.8)                      | 155 (0.5)                           | 108 (0.4)                           | 89 (0.3)                             | 99.1              | 98.5     | 40.4     | 99.5     | 0.98                | 0             | 0.98  | 0.40             |
| Myocardial infarction               | 28,432 (98.7)                      | 96 (0.3)                            | 50 (0.2)                            | 222 (0.8)                            | 99.5              | 98.0     | 75.3     | 99.7     | 0.98                | 0             | 0.99  | 0.75             |
| Angina                              | 24,784 (86.1)                      | 72 (0.2)                            | 3,626 (12.6)                        | 318 (1.1)                            | 87.2              | 85.3     | 14.7     | 93.1     | 0.85                | -0.12         | 0.74  | 0.13             |
| Stroke                              | 28,192 (97.9)                      | 99 (0.3)                            | 208 (0.7)                           | 301 (1.0)                            | 98.9              | 96.9     | 66.2     | 99.5     | 0.97                | 0             | 0.98  | 0.66             |
| Polycystic ovaries or ovarian cysts | 25,079 (87.1)                      | 2,163 (7.5)                         | 818 (2.8)                           | 740 (2.6)                            | 89.6              | 85.6     | 33.2     | 94.4     | 0.85                | 0.05          | 0.79  | 0.28             |
| Preeclampsia <sup>2</sup>           | 57,653 (92.5)                      | 1,209 (1.9)                         | 1,743 (2.8)                         | 1,722 (2.8)                          | 95.3              | 90.3     | 53.8     | 97.5     | 0.90                | -0.01         | 0.91  | 0.51             |
| Diabetes                            | 27,322 (94.9)                      | 483 (1.7)                           | 163 (0.6)                           | 832 (2.9)                            | 97.8              | 92.3     | 72.0     | 98.8     | 0.92                | 0.01          | 0.96  | 0.71             |

<sup>1</sup> Includes women who had at least 1 full-term pregnancy (n=32,555)

<sup>2</sup> Includes women who had at least 1 full-term pregnancy (n=26,166)

Abbreviations: NPR: National Patient Register; PABAK: Prevalence and bias corrected kappa statistic



**Supplementary Table 6.** Subset analysis by smoking status (Have you ever smoked regularly for more than 1 year or 100 cigarettes in total?)

| Condition                           | Self-reported No/<br>NPR No (n, %) | Self-reported Yes/<br>NPR No (n, %) | Self-reported No/<br>NPR Yes (n, %) | Self-reported Yes/<br>NPR Yes (n, %) | Percent agreement |          |          |          | Prevalence<br>index | Bias<br>index | PABAK | Cohen's<br>Kappa |
|-------------------------------------|------------------------------------|-------------------------------------|-------------------------------------|--------------------------------------|-------------------|----------|----------|----------|---------------------|---------------|-------|------------------|
|                                     |                                    |                                     |                                     |                                      | Overall           | Expected | Positive | Negative |                     |               |       |                  |
| <i>Smoking Yes (n=34,274)</i>       |                                    |                                     |                                     |                                      |                   |          |          |          |                     |               |       |                  |
| Hypertension                        | 24,662 (81.2)                      | 3,394 (11.2)                        | 288 (0.9)                           | 2,036 (6.7)                          | 87.9              | 77.2     | 52.5     | 93.1     | 0.74                | 0.10          | 0.76  | 0.47             |
| Hyperlipidemia                      | 27,416 (90.2)                      | 2,635 (8.7)                         | 82 (0.3)                            | 247 (0.8)                            | 91.1              | 89.6     | 15.4     | 95.3     | 0.89                | 0.08          | 0.82  | 0.14             |
| Heart failure                       | 30,153 (99.3)                      | 109 (0.4)                           | 60 (0.2)                            | 58 (0.2)                             | 99.4              | 99.1     | 40.7     | 99.7     | 0.99                | 0             | 0.99  | 0.40             |
| Myocardial infarction               | 30,187 (99.4)                      | 56 (0.2)                            | 34 (0.1)                            | 103 (0.3)                            | 99.7              | 99.0     | 69.6     | 99.9     | 0.99                | 0             | 0.99  | 0.69             |
| Angina                              | 27,146 (89.4)                      | 41 (0.1)                            | 3,008 (9.9)                         | 185 (0.6)                            | 90.0              | 88.9     | 10.8     | 94.7     | 0.89                | -0.10         | 0.80  | 0.10             |
| Stroke                              | 29,954 (98.6)                      | 66 (0.2)                            | 164 (0.5)                           | 196 (0.6)                            | 99.2              | 98.0     | 63.0     | 99.6     | 0.98                | 0             | 0.98  | 0.63             |
| Polycystic ovaries or ovarian cysts | 27,084 (89.2)                      | 1,824 (6.0)                         | 802 (2.6)                           | 670 (2.2)                            | 91.4              | 87.7     | 33.8     | 95.4     | 0.87                | 0.03          | 0.83  | 0.29             |
| Preeclampsia <sup>1</sup>           | 57,206 (92.4)                      | 1,208 (2.0)                         | 1,743 (2.8)                         | 1,724 (2.8)                          | 95.2              | 90.2     | 53.9     | 97.5     | 0.90                | -0.01         | 0.90  | 0.51             |
| Diabetes                            | 29,555 (97.3)                      | 220 (0.7)                           | 102 (0.3)                           | 503 (1.7)                            | 98.9              | 95.7     | 75.8     | 99.5     | 0.96                | 0             | 0.98  | 0.75             |
| <i>Smoking No (n=30,380)</i>        |                                    |                                     |                                     |                                      |                   |          |          |          |                     |               |       |                  |
| Hypertension                        | 26,458 (77.2)                      | 4,592 (13.4)                        | 385 (1.1)                           | 2,839 (8.3)                          | 85.5              | 73.0     | 53.3     | 91.4     | 0.69                | 0.12          | 0.71  | 0.46             |
| Hyperlipidemia                      | 30,023 (87.6)                      | 3,767 (11.0)                        | 111 (0.3)                           | 373 (1.1)                            | 88.7              | 86.8     | 16.1     | 93.9     | 0.87                | 0.11          | 0.77  | 0.14             |
| Heart failure                       | 33,979 (99.1)                      | 131 (0.4)                           | 90 (0.3)                            | 74 (0.2)                             | 99.4              | 98.9     | 40.1     | 99.7     | 0.99                | 0             | 0.99  | 0.40             |
| Myocardial infarction               | 33,902 (98.9)                      | 88 (0.3)                            | 50 (0.1)                            | 234 (0.7)                            | 99.6              | 98.2     | 77.2     | 99.8     | 0.98                | 0             | 0.99  | 0.77             |
| Angina                              | 29,821 (87.0)                      | 79 (0.2)                            | 4,095 (11.9)                        | 279 (0.8)                            | 87.8              | 86.5     | 11.8     | 93.5     | 0.86                | -0.12         | 0.76  | 0.10             |
| Stroke                              | 33,594 (98.0)                      | 105 (0.3)                           | 248 (0.7)                           | 327 (1.0)                            | 99.0              | 97.1     | 64.9     | 99.5     | 0.97                | 0             | 0.98  | 0.64             |
| Polycystic ovaries or ovarian cysts | 29,781 (86.9)                      | 2,660 (7.8)                         | 1,018 (3.0)                         | 815 (2.4)                            | 89.3              | 85.6     | 30.7     | 94.2     | 0.85                | 0.05          | 0.79  | 0.25             |
| Preeclampsia <sup>2</sup>           | 57,535 (92.5)                      | 1,209 (1.9)                         | 1,745 (2.8)                         | 1,723 (2.8)                          | 95.3              | 90.2     | 53.8     | 97.5     | 0.90                | -0.01         | 0.91  | 0.51             |
| Diabetes                            | 33,125 (96.6)                      | 380 (1.1)                           | 156 (0.5)                           | 613 (1.8)                            | 98.4              | 95.0     | 69.6     | 99.2     | 0.95                | 0.01          | 0.97  | 0.69             |

<sup>1</sup> Includes women who had at least 1 full-term pregnancy (n=27,300)

<sup>2</sup> Includes women who had at least 1 full-term pregnancy (n=31,525)

Abbreviations: NPR: National Patient Register; PABAK: Prevalence and bias corrected kappa statistic

**Supplementary Table 7.** Odds ratio and corresponding 95% confidence intervals for positive specific agreement in each medical condition. Significant associations (P<0.05) are denoted in bold.

| Condition                                           | Age 50-59<br>vs<br>Age<50 | Age≥60<br>vs<br>Age<50    | Intermediate<br>vs<br>Elementary | University<br>vs<br>Elementary | BMI≥25<br>vs<br>BMI<25    | Smoking No<br>vs<br>Smoking Yes |
|-----------------------------------------------------|---------------------------|---------------------------|----------------------------------|--------------------------------|---------------------------|---------------------------------|
| <i>Unadjusted</i>                                   |                           |                           |                                  |                                |                           |                                 |
| Hypertension                                        | <b>1.15 (1.06 – 1.26)</b> | <b>1.12 (1.04 – 1.22)</b> | 1.02 (0.97 – 1.08)               | 1.04 (0.98 – 1.09)             | 1.04 (1.00 – 1.08)        | 0.99 (0.95 – 1.03)              |
| Hyperlipidemia                                      | 1.37 (0.87 – 2.35)        | 1.49 (0.98 – 2.51)        | 0.84 (0.70 – 1.01)               | 0.93 (0.78 – 1.10)             | 1.05 (0.93 – 1.20)        | 0.96 (0.84 – 1.09)              |
| Heart failure                                       | 1.29 (0.57 – 3.70)        | 1.41 (0.72 – 3.92)        | 0.92 (0.59 – 1.42)               | 0.76 (0.48 – 1.16)             | 0.94 (0.67 – 1.36)        | 1.08 (0.77 – 1.47)              |
| Myocardial infarction                               | 1.05 (0.80 – 1.44)        | 1.02 (0.81 – 1.36)        | 1.11 (0.93 – 1.33)               | 1.09 (0.92 – 1.30)             | 1.06 (0.93 – 1.21)        | <b>0.87 (0.75 – 0.99)</b>       |
| Angina                                              | <b>1.65 (1.04 – 2.80)</b> | 1.51 (0.96 – 2.50)        | 0.99 (0.81 – 1.22)               | 1.09 (0.91 – 1.33)             | 1.14 (0.98 – 1.35)        | 1.09 (0.95 – 1.25)              |
| Stroke                                              | 0.99 (0.78 – 1.25)        | 0.96 (0.79 – 1.17)        | 1.00 (0.82 – 1.21)               | 1.01 (0.86 – 1.19)             | 1.02 (0.90 – 1.16)        | 0.98 (0.86 – 1.11)              |
| Polycystic ovaries or ovarian cysts                 | 0.89 (0.79 – 1.01)        | 0.98 (0.87 – 1.11)        | 0.85 (0.72 – 1.00)               | 0.94 (0.80 – 1.11)             | <b>1.16 (1.05 – 1.29)</b> | 1.05 (0.95 – 1.16)              |
| Preeclampsia <sup>1</sup>                           | <b>0.73 (0.67 – 0.79)</b> | <b>0.35 (0.31 – 0.41)</b> | <b>1.82 (1.51 – 2.22)</b>        | <b>1.83 (1.54 – 2.23)</b>      | 0.95 (0.88 – 1.03)        | <b>1.20 (1.10 – 1.30)</b>       |
| Diabetes                                            | <b>0.85 (0.77 – 0.95)</b> | <b>0.86 (0.79 – 0.93)</b> | 1.04 (0.94 – 1.16)               | 1.02 (0.93 – 1.13)             | <b>1.09 (1.00 – 1.18)</b> | <b>1.09 (1.02 – 1.17)</b>       |
| <i>Multivariable-adjusted, all covariates shown</i> |                           |                           |                                  |                                |                           |                                 |
| Hypertension                                        | <b>1.16 (1.07 – 1.27)</b> | <b>1.14 (1.05 – 1.24)</b> | 1.04 (0.98 – 1.09)               | 1.05 (0.99 – 1.10)             | 1.04 (1.00 – 1.08)        | 1.00 (0.96 – 1.03)              |
| Hyperlipidemia                                      | 1.34 (0.86 – 2.29)        | 1.43 (0.94 – 2.42)        | 0.87 (0.72 – 1.05)               | 0.95 (0.80 – 1.14)             | 1.05 (0.92 – 1.20)        | 0.96 (0.84 – 1.09)              |
| Heart failure                                       | 1.38 (0.59 – 4.20)        | 1.49 (0.73 – 4.36)        | 0.96 (0.62 – 1.55)               | 0.76 (0.48 – 1.17)             | 0.90 (0.64 – 1.33)        | 1.08 (0.76 – 1.50)              |
| Myocardial infarction                               | 1.03 (0.77 – 1.43)        | 1.04 (0.80 – 1.40)        | 1.14 (0.95 – 1.40)               | 1.12 (0.93 – 1.34)             | 1.06 (0.93 – 1.23)        | 0.87 (0.75 – 0.99)              |
| Angina                                              | <b>1.68 (1.06 – 2.82)</b> | 1.53 (0.96 – 2.53)        | 1.01 (0.81 – 1.24)               | 1.11 (0.92 – 1.36)             | 1.16 (0.99 – 1.37)        | 1.10 (0.96 – 1.27)              |
| Stroke                                              | 0.98 (0.77 – 1.24)        | 0.94 (0.76 – 1.18)        | 0.98 (0.80 – 1.20)               | 1.00 (0.85 – 1.19)             | 1.03 (0.90 – 1.16)        | 0.98 (0.86 – 1.11)              |
| Polycystic ovaries or ovarian cysts                 | 0.88 (0.78 – 1.01)        | 0.95 (0.83 – 1.08)        | 0.85 (0.71 – 1.02)               | 0.95 (0.81 – 1.13)             | 1.17 (1.06 – 1.30)        | 1.04 (0.94 – 1.16)              |
| Preeclampsia <sup>1</sup>                           | <b>0.75 (0.69 – 0.82)</b> | <b>0.38 (0.33 – 0.43)</b> | <b>1.29 (1.06 – 1.58)</b>        | <b>1.37 (1.14 – 1.68)</b>      | 1.02 (0.94 – 1.11)        | 1.08 (0.99 – 1.18)              |
| Diabetes                                            | <b>0.87 (0.79 – 0.97)</b> | <b>0.87 (0.81 – 0.95)</b> | 1.02 (0.92 – 1.14)               | 1.00 (0.91 – 1.11)             | <b>1.10 (1.01 – 1.19)</b> | <b>1.08 (1.01 – 1.16)</b>       |

BMI: body mass index

<sup>1</sup> Includes women who had at least 1 full-term pregnancy
